# Supplementary material for: Genome Analysis of Celeribacter sp. PS-C1 Isolated from Sekinchan Beach in Selangor, Malaysia, Reveals Its β-Glucosidase and Licheninase Activities
Source: MDPI journal article supplement (doi:10.3390/microorganisms10020410), 2022-02-10
Supplement: s1 [file s1]

**Table S5.** List of NCBI GenBank/RefSeq accession numbers for glycoside hydrolases (GHs) in *Celeribacter* genomes.

| Category<br>(CAZy GH family)            | Predicted function | Identity within <i>Celeribacter</i> genomes (%) |                  |       |                        |     |                       |                       |                        |                    |                     |       |          |         |     |      |
|-----------------------------------------|--------------------|-------------------------------------------------|------------------|-------|------------------------|-----|-----------------------|-----------------------|------------------------|--------------------|---------------------|-------|----------|---------|-----|------|
|                                         | (EC number)        | PS-C1                                           | P73 <sup>T</sup> | TSPH2 | IMCC12053 <sup>T</sup> | LH4 | DSM27375 <sup>T</sup> | DSM26471 <sup>T</sup> | DSM100434 <sup>T</sup> | NH195 <sup>T</sup> | ZXM137 <sup>T</sup> | G3M19 | ASW11-22 | EaN35-2 | B30 | HF31 |
| Cellulose-<br>degrading enzyme<br>(GH1) |                    |                                                 |                  |       |                        |     |                       |                       |                        |                    |                     |       |          |         |     |      |
|                                         |                    |                                                 |                  |       |                        |     |                       |                       |                        |                    |                     |       |          |         |     |      |
|                                         |                    |                                                 |                  |       |                        |     |                       |                       |                        |                    |                     |       |          |         |     |      |
|                                         |                    |                                                 |                  |       |                        |     |                       |                       |                        |                    |                     |       |          |         |     |      |
|                                         |                    |                                                 |                  |       |                        |     |                       |                       |                        |                    |                     |       |          |         |     |      |
|                                         |                    |                                                 |                  |       |                        |     |                       |                       |                        |                    |                     |       |          |         |     |      |
|                                         |                    |                                                 |                  |       |                        |     |                       |                       |                        |                    |                     |       |          |         |     |      |
|                                         |                    |                                                 |                  |       |                        |     |                       |                       |                        |                    |                     |       |          |         |     |      |
|                                         |                    |                                                 |                  |       |                        |     |                       |                       |                        |                    |                     |       |          |         |     |      |
|                                         |                    |                                                 |                  |       |                        |     |                       |                       |                        |                    |                     |       |          |         |     |      |
|                                         |                    |                                                 |                  |       |                        |     |                       |                       |                        |                    |                     |       |          |         |     |      |
|                                         |                    |                                                 |                  |       |                        |     |                       |                       |                        |                    |                     |       |          |         |     |      |
|                                         |                    |                                                 |                  |       |                        |     |                       |                       |                        |                    |                     |       |          |         |     |      |
|                                         |                    |                                                 |                  |       |                        |     |                       |                       |                        |                    |                     |       |          |         |     |      |
|                                         |                    |                                                 |                  |       |                        |     |                       |                       |                        |                    |                     |       |          |         |     |      |
|                                         |                    |                                                 |                  |       |                        |     |                       |                       |                        |                    |                     |       |          |         |     |      |
|                                         |                    |                                                 |                  |       |                        |     |                       |                       |                        |                    |                     |       |          |         |     |      |
|                                         |                    |                                                 |                  |       |                        |     |                       |                       |                        |                    |                     |       |          |         |     |      |
|                                         |                    |                                                 |                  |       |                        |     |                       |                       |                        |                    |                     |       |          |         |     |      |
|                                         |                    |                                                 |                  |       |                        |     |                       |                       |                        |                    |                     |       |          |         |     |      |
|                                         |                    |                                                 |                  |       |                        |     |                       |                       |                        |                    |                     |       |          |         |     |      |
|                                         |                    |                                                 |                  |       |                        |     |                       |                       |                        |                    |                     |       |          |         |     |      |
|                                         |                    |                                                 |                  |       |                        |     |                       |                       |                        |                    |                     |       |          |         |     |      |
|                                         |                    |                                                 |                  |       |                        |     |                       |                       |                        |                    |                     |       |          |         |     |      |
|                                         |                    |                                                 |                  |       |                        |     |                       |                       |                        |                    |                     |       |          |         |     |      |
|                                         |                    |                                                 |                  |       |                        |     |                       |                       |                        |                    |                     |       |          |         |     |      |
|                                         |                    |                                                 |                  |       |                        |     |                       |                       |                        |                    |                     |       |          |         |     |      |
|                                         |                    |                                                 |                  |       |                        |     |                       |                       |                        |                    |                     |       |          |         |     |      |
|                                         |                    |                                                 |                  |       |                        |     |                       |                       |                        |                    |                     |       |          |         |     |      |
|                                         |                    |                                                 |                  |       |                        |     |                       |                       |                        |                    |                     |       |          |         |     |      |
|                                         |                    |                                                 |                  |       |                        |     |                       |                       |                        |                    |                     |       |          |         |     |      |
|                                         |                    |                                                 |                  |       |                        |     |                       |                       |                        |                    |                     |       |          |         |     |      |
|                                         |                    |                                                 |                  |       |                        |     |                       |                       |                        |                    |                     |       |          |         |     |      |
|                                         |                    |                                                 |                  |       |                        |     |                       |                       |                        |                    |                     |       |          |         |     |      |
|                                         |                    |                                                 |                  |       |                        |     |                       |                       |                        |                    |                     |       |          |         |     |      |
|                                         |                    |                                                 |                  |       |                        |     |                       |                       |                        |                    |                     |       |          |         |     |      |
|                                         |                    |                                                 |                  |       |                        |     |                       |                       |                        |                    |                     |       |          |         |     |      |
|                                         |                    |                                                 |                  |       |                        |     |                       |                       |                        |                    |                     |       |          |         |     |      |
|                                         |                    |                                                 |                  |       |                        |     |                       |                       |                        |                    |                     |       |          |         |     |      |
|                                         |                    |                                                 |                  |       |                        |     |                       |                       |                        |                    |                     |       |          |         |     |      |
|                                         |                    |                                                 |                  |       |                        |     |                       |                       |                        |                    |                     |       |          |         |     |      |
|                                         |                    |                                                 |                  |       |                        |     |                       |                       |                        |                    |                     |       |          |         |     |      |
|                                         |                    |                                                 |                  |       |                        |     |                       |                       |                        |                    |                     |       |          |         |     |      |
|                                         |                    |                                                 |                  |       |                        |     |                       |                       |                        |                    |                     |       |          |         |     |      |
|                                         |                    |                                                 |                  |       |                        |     |                       |                       |                        |                    |                     |       |          |         |     |      |
|                                         |                    |                                                 |                  |       |                        |     |                       |                       |                        |                    |                     |       |          |         |     |      |
|                                         |                    |                                                 |                  |       |                        |     |                       |                       |                        |                    |                     |       |          |         |     |      |
|                                         |                    |                                                 |                  |       |                        |     |                       |                       |                        |                    |                     |       |          |         |     |      |
|                                         |                    |                                                 |                  |       |                        |     |                       |                       |                        |                    |                     |       |          |         |     |      |
|                                         |                    |                                                 |                  |       |                        |     |                       |                       |                        |                    |                     |       |          |         |     |      |
|                                         |                    |                                                 |                  |       |                        |     |                       |                       |                        |                    |                     |       |          |         |     |      |
|                                         |                    |                                                 |                  |       |                        |     |                       |                       |                        |                    |                     |       |          |         |     |      |
|                                         |                    |                                                 |                  |       |                        |     |                       |                       |                        |                    |                     |       |          |         |     |      |
|                                         |                    |                                                 |                  |       |                        |     |                       |                       |                        |                    |                     |       |          |         |     |      |
|                                         |                    |                                                 |                  |       |                        |     |                       |                       |                        |                    |                     |       |          |         |     |      |
|                                         |                    |                                                 |                  |       |                        |     |                       |                       |                        |                    |                     |       |          |         |     |      |
|                                         |                    |                                                 |                  |       |                        |     |                       |                       |                        |                    |                     |       |          |         |     |      |
|                                         |                    |                                                 |                  |       |                        |     |                       |                       |                        |                    |                     |       |          |         |     |      |
|                                         |                    |                                                 |                  |       |                        |     |                       |                       |                        |                    |                     |       |          |         |     |      |
|                                         |                    |                                                 |                  |       |                        |     |                       |                       |                        |                    |                     |       |          |         |     |      |
|                                         |                    |                                                 |                  |       |                        |     |                       |                       |                        |                    |                     |       |          |         |     |      |
|                                         |                    |                                                 |                  |       |                        |     |                       |                       |                        |                    |                     |       |          |         |     |      |
|                                         |                    |                                                 |                  |       |                        |     |                       |                       |                        |                    |                     |       |          |         |     |      |
|                                         |                    |                                                 |                  |       |                        |     |                       |                       |                        |                    |                     |       |          |         |     |      |
|                                         |                    |                                                 |                  |       |                        |     |                       |                       |                        |                    |                     |       |          |         |     |      |
|                                         |                    |                                                 |                  |       |                        |     |                       |                       |                        |                    |                     |       |          |         |     |      |
|                                         |                    |                                                 |                  |       |                        |     |                       |                       |                        |                    |                     |       |          |         |     |      |
|                                         |                    |                                                 |                  |       |                        |     |                       |                       |                        |                    |                     |       |          |         |     |      |
|                                         |                    |                                                 |                  |       |                        |     |                       |                       |                        |                    |                     |       |          |         |     |      |
|                                         |                    |                                                 |                  |       |                        |     |                       |                       |                        |                    |                     |       |          |         |     |      |
|                                         |                    |                                                 |                  |       |                        |     |                       |                       |                        |                    |                     |       |          |         |     |      |
|                                         |                    |                                                 |                  |       |                        |     |                       |                       |                        |                    |                     |       |          |         |     |      |
|                                         |                    |                                                 |                  |       |                        |     |                       |                       |                        |                    |                     |       |          |         |     |      |

PS-C1: Strain PS-C1; EaN35-2: *Celeribacter naphthalenivorans* EaN35-2; HF31: *Celeribacter* sp. HF31; NH195<sup>T</sup>: *Celeribacter ethanolicus* NH195<sup>T</sup> [27]; TSPH2: *Celeribacter ethanolicus* TSPH2 [30]; ZXM137<sup>T</sup>: *Celeribacter halophilus* ZXM137<sup>T</sup>; G3M19: *Celeribacter halophilus* G3M19; DSM100434<sup>T</sup>: *Celeribacter persicus* DSM100434<sup>T</sup> [26]; DSM26471<sup>T</sup>: *Celeribacter neptunius* DSM26471<sup>T</sup> [19]; ASW11-22: *Celeribacter* sp. ASW11-22; P73<sup>T</sup>: *Celeribacter indicus* P73<sup>T</sup> [16,24]; B30: *Celeribacter baekdonensis* B30; DSM27375<sup>T</sup>: *Celeribacter baekdonensis* DSM27375<sup>T</sup>; LH4: *Celeribacter baekdonensis* LH4 [32]; IMCC12053<sup>T</sup>: *Celeribacter marinus* IMCC12053<sup>T</sup> [25,31]. Characteristics scored as: -, absence. <sup>T</sup> type strain.

Table S5. Continued.

| Category<br>(CAZy GH family)   | Predicted function<br>(EC number) | Identity within <i>Celeribacter</i> genomes (%) |                    |       |                        |                    |                       |                       |                        |                     |                        |                        |                              |         |                               |                                |                        |
|--------------------------------|-----------------------------------|-------------------------------------------------|--------------------|-------|------------------------|--------------------|-----------------------|-----------------------|------------------------|---------------------|------------------------|------------------------|------------------------------|---------|-------------------------------|--------------------------------|------------------------|
|                                |                                   | PS-C1                                           | P73 <sup>T</sup>   | TSPH2 | IMCC12053 <sup>T</sup> | LH4                | DSM27375 <sup>T</sup> | DSM26471 <sup>T</sup> | DSM100434 <sup>T</sup> | NH195 <sup>T</sup>  | ZXM137 <sup>T</sup>    | G3M19                  | ASW11-22                     | EaN35-2 | B30                           | HF31                           |                        |
| Hemicellulose-degrading enzyme |                                   |                                                 |                    |       |                        |                    |                       |                       |                        |                     |                        |                        |                              |         |                               |                                |                        |
|                                | (GH2)                             | β-mannosidase<br>(3.2.1.25)                     | -                  | -     | WP_0968<br>05090.1     | -                  | CP02847<br>5.1_1194   | WP_0746458<br>74.1    | -                      | WP_107815347.1<br>1 | LRUC010000<br>45.1_116 | -                      | -                            | -       | -                             | AMR<br>K0100<br>0004.1<br>_168 | -                      |
|                                | (GH26)                            | β-1,3-xylanase<br>(3.2.1.32)                    | WP_219785<br>562.1 | -     | -                      | -                  | -                     | -                     | -                      | -                   | -                      | -                      | -                            | -       | -                             | -                              | WP_1<br>676002<br>67.1 |
|                                | (GH36)                            | α-galactosidase<br>(3.2.1.22)                   | -                  | -     | -                      | -                  | -                     | -                     | -                      | -                   | -                      | LRUD0100<br>0026.1_120 | JAHKPE0<br>10000030.1<br>_96 | -       | -                             | -                              | -                      |
|                                | (GH43)                            | β-xylosidase<br>(3.2.1.37)                      | -                  | -     | -                      | WP_06221493<br>9.1 | -                     | -                     | -                      | -                   | -                      | -                      | -                            | -       | -                             | -                              | -                      |
|                                | (GH51)                            | α-L-<br>arabinofuranosidase<br>(3.2.1.55)       | -                  | -     | -                      | -                  | -                     | -                     | -                      | -                   | -                      | -                      | -                            | -       | JAIVLK010<br>000001.1_5<br>88 | -                              | -                      |

PS-C1: Strain PS-C1; EaN35-2: *Celeribacter naphthalenivorans* EaN35-2; HF31: *Celeribacter* sp. HF31; NH195<sup>T</sup>: *Celeribacter ethanolicus* NH195<sup>T</sup> [27]; TSPH2: *Celeribacter ethanolicus* TSPH2 [30]; ZXM137<sup>T</sup>: *Celeribacter halophilus* ZXM137<sup>T</sup>; G3M19: *Celeribacter halophilus* G3M19; DSM100434<sup>T</sup>: *Celeribacter persicus* DSM100434<sup>T</sup> [26]; DSM26471<sup>T</sup>: *Celeribacter neptunius* DSM26471<sup>T</sup> [19]; ASW11-22: *Celeribacter* sp. ASW11-22; P73<sup>T</sup>: *Celeribacter indicus* P73<sup>T</sup> [16,24]; B30: *Celeribacter baekdonensis* B30; DSM27375<sup>T</sup>: *Celeribacter baekdonensis* DSM27375<sup>T</sup>; LH4: *Celeribacter baekdonensis* LH4 [32]; IMCC12053<sup>T</sup>: *Celeribacter marinus* IMCC12053<sup>T</sup> [25,31]. Characteristics scored as: -, absence. <sup>T</sup> type strain.

Table S5. Continued.

| Category<br>(CAZy GH family)          | Predicted function<br>(EC number)   | Identity within <i>Celeribacter</i> genomes (%) |                    |                    |                        |                    |                       |                       |                        |                        |                              |                                   |                  |                  |              |                                |
|---------------------------------------|-------------------------------------|-------------------------------------------------|--------------------|--------------------|------------------------|--------------------|-----------------------|-----------------------|------------------------|------------------------|------------------------------|-----------------------------------|------------------|------------------|--------------|--------------------------------|
|                                       |                                     | PS-C1                                           | P73 <sup>T</sup>   | TSPH2              | IMCC12053 <sup>T</sup> | LH4                | DSM27375 <sup>T</sup> | DSM26471 <sup>T</sup> | DSM100434 <sup>T</sup> | NH195 <sup>T</sup>     | ZXM137 <sup>T</sup>          | G3M19                             | ASW11-22         | EaN35-2          | B30          | HF31                           |
| Starch-<br>degrading enzyme<br>(GH13) | $\alpha$ -amylase<br>(3.2.1.1)      | -                                               | -                  | -                  | -                      | -                  | -                     | -                     | -                      | -                      | LRUD0100JAHKPE               | -                                 | -                | AMR              | -            |                                |
|                                       |                                     |                                                 |                    |                    |                        |                    |                       |                       |                        |                        | 0012.1_184 0100000           |                                   |                  | K0100            |              |                                |
|                                       |                                     |                                                 |                    |                    |                        |                    |                       |                       |                        |                        | 31.1_875                     |                                   |                  | 0009.1<br>_1     |              |                                |
| (GH13)                                | Oligo-1,6-glucosidase<br>(3.2.1.10) | -                                               | -                  | -                  | -                      | -                  | -                     | -                     | -                      | -                      | -                            | -                                 | -                | AMR              | -            |                                |
|                                       |                                     |                                                 |                    |                    |                        |                    |                       |                       |                        |                        |                              |                                   |                  | K0100            |              |                                |
|                                       |                                     |                                                 |                    |                    |                        |                    |                       |                       |                        |                        |                              |                                   |                  | 0009.1<br>_2     |              |                                |
| (GH13)                                | $\alpha$ -glucosidase<br>(3.2.1.20) | WP_219784<br>593.1                              | WP_043871<br>237.1 | WP_0968<br>05181.1 | WP_06221566<br>0.1     | CP02847<br>5.1_717 | WP_143026706<br>1     | WP_090058665<br>1     | WP_107816651<br>1      | LRUC0100<br>0045.1_116 | LRUD0100JAHKPE<br>0054.1_143 | WP_2245041<br>0100000<br>13.1_156 | JAIVLK01<br>52.1 | 0000002.1<br>309 | AMR<br>K0100 | WP_1<br>67600<br>630.1<br>_183 |

PS-C1: Strain PS-C1; EaN35-2: *Celeribacter naphthalenivorans* EaN35-2; HF31: *Celeribacter* sp. HF31; NH195<sup>T</sup>: *Celeribacter ethanolicus* NH195<sup>T</sup> [27]; TSPH2: *Celeribacter ethanolicus* TSPH2 [30]; ZXM137<sup>T</sup>: *Celeribacter halophilus* ZXM137<sup>T</sup>; G3M19: *Celeribacter halophilus* G3M19; DSM100434<sup>T</sup>: *Celeribacter persicus* DSM100434<sup>T</sup> [26]; DSM26471<sup>T</sup>: *Celeribacter neptunius* DSM26471<sup>T</sup> [19]; ASW11-22: *Celeribacter* sp. ASW11-22; P73<sup>T</sup>: *Celeribacter indicus* P73<sup>T</sup> [16,24]; B30: *Celeribacter baekdonensis* B30; DSM27375<sup>T</sup>: *Celeribacter baekdonensis* DSM27375<sup>T</sup>; LH4: *Celeribacter baekdonensis* LH4 [32]; IMCC12053<sup>T</sup>: *Celeribacter marinus* IMCC12053<sup>T</sup> [25,31]. Characteristics scored as: -, absence. <sup>T</sup> type strain.
