# Supplementary material for: Genome Analysis of Celeribacter sp. PS-C1 Isolated from Sekinchan Beach in Selangor, Malaysia, Reveals Its β-Glucosidase and Licheninase Activities
Source: MDPI journal article supplement (doi:10.3390/microorganisms10020410), 2022-02-10
Supplement: s1 [file s1]

**Table S1.** Collective biochemical characterisation of strain PS-C1 using Analytical Profile Index (API) analyses

| API ZYM<br>(enzyme reaction)       |   | API 20E<br>(substrate/chemical utilization) |   | API 20NE<br>(substrate/chemical utilization)          |   | API 50CH<br>(carbohydrate degradation) |   |                           |   |
|------------------------------------|---|---------------------------------------------|---|-------------------------------------------------------|---|----------------------------------------|---|---------------------------|---|
| Alkaline phosphatase               | - | $\beta$ -galactosidase                      | + | Nitrate reduction                                     | + | Glycerol                               | - | Salicin                   | - |
| Esterase (C4)                      | + | L-arginine                                  | - | Indole production                                     | - | Erythritol                             | - | D-cellobiose              | - |
| Esterase Lipase (C8)               | - | L-lysine                                    | - | Glucose fermentation                                  | - | D-arabinose                            | - | D-maltose                 | - |
| Lipase (C14)                       | - | L-omithine                                  | - | L-arginine                                            | - | L-arabinose                            | + | D-lactose                 | - |
| Leucine arylamidase                | + | Trisodium citrate                           | + | Urea                                                  | + | D-ribose                               | - | D-melibiose               | - |
| Valine arylamidase                 | - | Sodium thiosulfate                          | - | Esculin ferric citrate                                | + | D-xylose                               | - | D-saccharose (sucrose)    | - |
| Cystine arylamidase                | - | Urea                                        | + | Gelatin hydrolysis                                    | - | L-xylose                               | - | D-trehalose               | - |
| Trypsin                            | - | L-tryptophan utilization                    | - | <i>p</i> -nitrophenyl- $\beta$ -D-galactopyranosidase | + | D-adonitol                             | - | Inulin                    | - |
| $\alpha$ -chymotrypsin             | - | L-tryptophan production                     | - | D-glucose                                             | - | Methyl- $\beta$ -D-Xylopyranoside      | - | D-melezitose              | - |
| Acid phosphatase                   | + | Sodium pyruvate                             | + | L-arabinose                                           | - | D-galactose                            | - | D-raffinose               | - |
| Naphthol-AS-BI-phosphohydrolase    | - | Gelatin                                     | - | D-mannose                                             | - | D-glucose                              | + | Amidon (starch)           | - |
| $\alpha$ -galactosidase            | - | D-glucose                                   | + | D-mannitol                                            | - | D-fructose                             | - | Glycogen                  | - |
| $\beta$ -galactosidase             | - | D-mannitol                                  | - | N-acetyl-glucosamine                                  | - | D-mannose                              | - | Xylitol                   | - |
| $\beta$ -glucuronidase             | - | Inositol                                    | - | D-maltose                                             | - | L-sorbose                              | - | Gentiobiose               | - |
| $\alpha$ -glucosidase              | + | D-sorbitol                                  | - | Potassium gluconate                                   | - | L-rhamnose                             | - | D-Turanose                | - |
| $\beta$ -glucosidase               | + | L-rhamnose                                  | - | Capric acid                                           | - | Dulcitol                               | - | D-Lyxose                  | - |
| N-acetyl- $\beta$ -glucosaminidase | - | D-saccharose                                | - | Adipic acid                                           | - | Inositol                               | - | D-Tagatose                | - |
| $\alpha$ -mannosidase              | - | D-melibiose                                 | - | Malic acid                                            | - | D-mannitol                             | - | D-Fucose                  | + |
| $\alpha$ -fucosidase               | - | D-saccharose                                | - | Trisodium citrate                                     | - | D-sorbitol                             | - | L-fucose                  | - |
|                                    |   | D-melibiose                                 | - | Phenylacetic acid                                     | - | Methyl- $\alpha$ -D-mannopyranoside    | - | D-arabitol                | - |
|                                    |   | Amygladine                                  | - | Oxidase                                               | - | Methyl- $\alpha$ -D-glucopyranoside    | - | L-arabitol                | - |
|                                    |   | L-arabinose                                 | + |                                                       |   | N-acetylglucosamine                    | - | Potassium gluconate       | - |
|                                    |   |                                             |   |                                                       |   | Amygdalin                              | - | Potassium 2-ketogluconate | - |
|                                    |   |                                             |   |                                                       |   | Arbutin                                | + | Potassium 5-ketogluconate | - |
|                                    |   |                                             |   |                                                       |   | Esculin ferric citrate                 | + |                           |   |
